# Supplementary material for: Interaction of disposable face mask (nano)microplastics with antibiotics: performance and mechanisms
Source: Royal Society of Chemistry journal article supplement (doi:10.1039/d3en00775h), 2024-01-01
Supplement: d3en00775h1.pdf [file d3en00775h1.pdf]

## Supporting Information for

### Interaction of disposable face masks (nano)microplastics with antibiotics: performance and mechanisms

Ting Zhang<sup>1</sup>, Xi Chen<sup>1,2</sup>, Angrui Jiang<sup>1,2</sup>, Jingfan Qi<sup>1,2</sup>, Zhaoyang You<sup>1,\*</sup>, Kinjal J.

Shah<sup>1,\*</sup>

<sup>1</sup>College of Urban Construction, Nanjing Tech University, Nanjing, 211800, China

<sup>2</sup>Yangtze River Innovation Center for Ecological Civilization, Nanjing, 211800,

China

#### 2.7 Sorption models and data analyses

The adsorption of pollutants by (nano)microplastic in solution is a complex process that can be controlled through the following steps: first, the spreading of the pollutants into the surrounding boundary layer; The second is film transport, in which pollutants diffuse through the liquid film around the microplastic; The third point is the diffusion and adsorption of pollutants between microplastic particles. In this study, in-particle diffusion and Boyd's model were applied to determine the diffusion mechanism in the adsorption system.

Pseudo-first reaction kinetic model (PFO) [1]:

$$Q_t = Q_{e,1} \left( 1 - e^{-K_1 t} \right) \quad (1)$$

The parameters in the formula are expressed as follows:  $Q_t$  represents the adsorption capacity at a certain time, mg/g;  $Q_{e,1}$  represents the adsorption amount at equilibrium reaction, mg/g;  $K_1$  is a quasi-first-order rate constant,  $h^{-1}$ ;  $t$  stands for adsorption time, h.

Pseudo-second-order kinetic model (PSO) [2]:

$$Q_t = \frac{K_2 Q_{e,2}^2 t}{1 + K_2 Q_{e,2}} \quad (2)$$

In the formula,  $K_2$  is the rate constant of the pseudo-second-order kinetic model, g/mg·h; The other parameters are the same as those of the pseudo-first-order dynamics model.

Intra-particle diffusion<sup>[3]</sup>:

$$Q_t = k_{id} t^{0.5} \quad (3)$$

Where,  $k_{id}$  is the intra particle diffusion constant (mg/g·h<sup>1/2</sup>), and its value can determine the different stages of mass decline of adsorbed material.  $C_i$  is a parameter related to the thickness of the microplastic boundary layer, µg/g.

- Boyd membrane diffusion model equation <sup>[4]</sup>:

$$F(t) = \frac{q}{q_e} = 1 - \left(\frac{6}{\pi^2}\right) \sum_{n=1}^{\infty} \left(\frac{1}{n^2}\right) \exp(-n^2 B_t) \quad (4)$$

- Simplified conversion is obtained:

$$B_t = -\ln\left(1 - \frac{Q_t}{Q_e}\right) - 0.4977 \quad (5)$$

Where  $F$  is the fraction that reaches equilibrium at different times  $t$ ;  $B_t$  is Boyd constant;  $Q_e$  represents the equilibrium adsorption capacity of the antibiotic, µg/g. Calculate the value of  $B_t$  based on the value of each  $Q_t$ , and then plot it against  $t$ . By applying the Fourier transform, then integrating as follows:

$$\text{For } F \text{ values} > 0.85 \Rightarrow B_t = -\ln(1 - F) - 0.4977 \quad (6)$$

$$\text{For } F \text{ values} < 0.85 \Rightarrow B_t = -\ln\left(\sqrt{\pi} - \sqrt{\pi - \frac{\pi^2 F}{3}}\right) \quad (7)$$

Where,  $q_t$  (µg/g) is the adsorption value of pollutants on microplastics at time  $t$  (h);  $q_e$  (µg/g) is the equilibrium adsorption capacity;  $k_{id}$  ((µg/ (g·h<sup>0.5</sup>)) is a parameter related to the phase  $i$  diffusion rate.  $C_i$  (µg/g) is a parameter related to the thickness of the (nano)microplastic boundary layer, and  $B_t$  is Boyd constant.

The adsorption isotherm model is as follows:

Langmuir model<sup>[5]</sup>:

$$Q_e = \frac{q_{max}K_L C_e}{1 + K_L C_e} \quad (8)$$

Freundlich model<sup>[4]</sup>:

$$Q_e = K_f C_e^{1/n} \quad (9)$$

Where,  $q_e$  is the equilibrium adsorption capacity of antibiotics,  $\mu\text{g/g}$ ;  $C_e$  is the equilibrium concentration of antibiotics,  $\text{mg/L}$ ;  $q_{max}$  is the maximum adsorption capacity of antibiotics in Langmuir model ( $\mu\text{g/g}$ ).  $K_L$  is the parameter of Langmuir's model,  $\text{L/mg}$ ;  $n$  is the linear exponent in Freundlich's model;  $K_f$  is the parameter of the Freundlich model,  $(\mu\text{g/g})/(\text{mg/L})$ .

### Reference:

[1] Zhou Z, Sun Y, Wang Y, et al. Adsorption behavior of Cu(II) and Cr(VI) on aged microplastics in antibiotics-heavy metals coexisting system[J]. Chemosphere, 2022,291:132794.DOI:10.1016/j.chemosphere.2021.132794.

[2] Ho Y S, McKay G. The kinetics of sorption of divalent metal ions onto sphagnum moss peat[J]. Water research (Oxford), 2000,34(3):735-742.DOI:10.1016/S0043-1354(99)00232-8.

[3] Lin L, Yuan B, Hong H, et al. Post COVID-19 pandemic: Disposable face masks as a potential vector of antibiotics in freshwater and seawater[J]. Science of The Total Environment, 2022,820:153049.DOI:10.1016/j.scitotenv.2022.153049.

[4] Wang J, Guo X. Adsorption kinetic models: Physical meanings, applications, and solving methods[J]. J Hazard Mater, 2020,390:122156.DOI:10.1016/j.jhazmat.2020.122156.

[5] Lin L, Yuan B, Zhang B, et al. Uncovering the disposable face masks as vectors of metal ions (Pb(II), Cd(II), Sr(II)) during the COVID-19 pandemic[J]. Chemical Engineering Journal, 2022,439:135613.DOI:10.1016/j.cej.2022.135613.

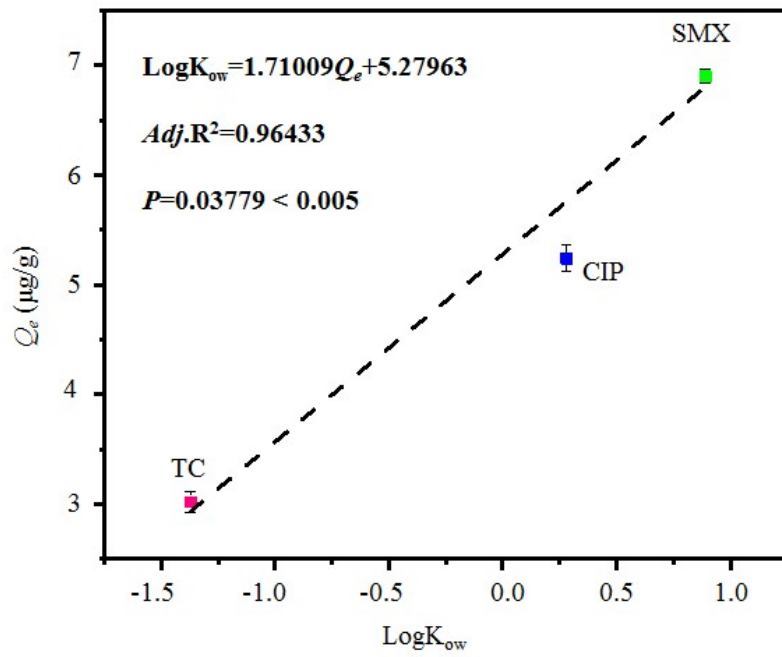

Fig.S1 Linear relationship between  $Q_e$  and octanol-water partition coefficient ( $\log K_{ow}$ ) of three antibiotics in pure water

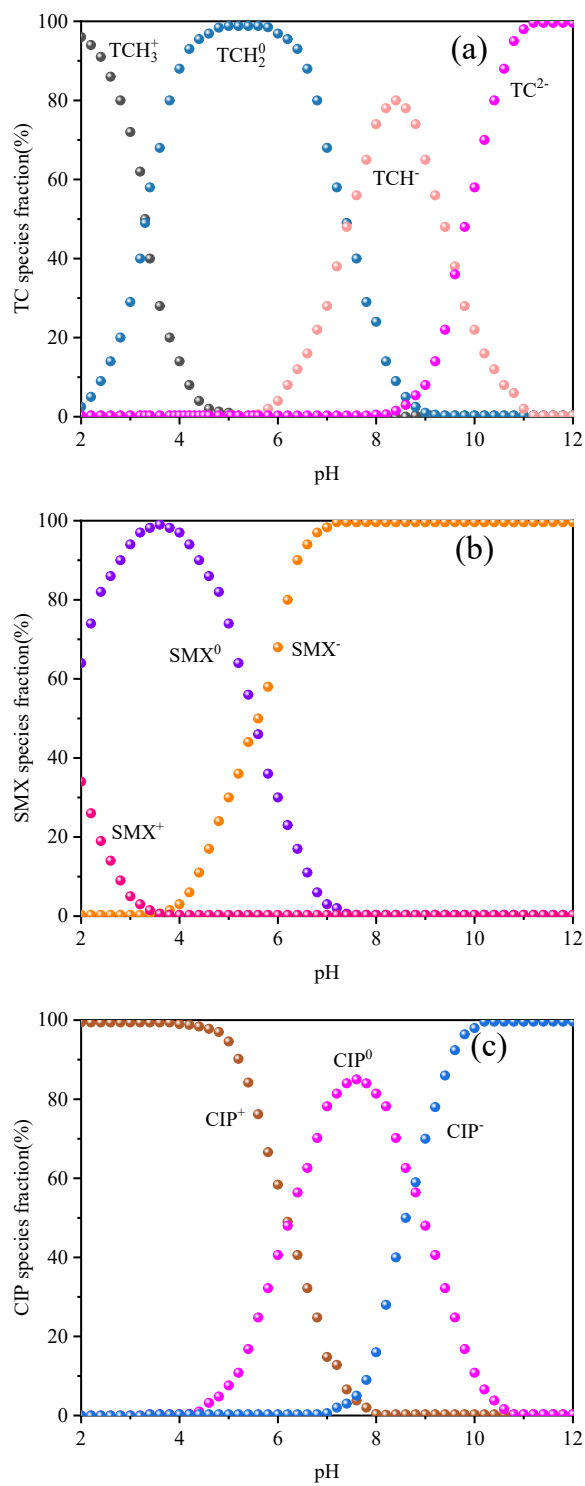

**Fig. S2.** Change of species fraction of TC (a), SMX (b), CIP (c) with pH value of solution

**Table S1**

Physicochemical properties of tested antibiotics

| Antibiotics               | Molecular formula     | structure                                                                          | Log Kow | pKa                                    |
|---------------------------|-----------------------|------------------------------------------------------------------------------------|---------|----------------------------------------|
| Tetracycline<br>(TC)      | $C_{22}H_{24}N_2O_8$  | 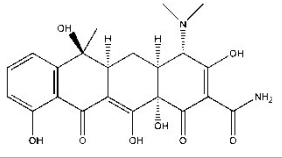 | -1.37   | pKa1 = 3.3<br>pKa2 = 7.7<br>pKa3 = 9.7 |
| Sulfamethoxazole<br>(SMX) | $C_{10}H_{11}N_3O_3S$ |  | 0.89    | pKa1 = 1.6<br>pKa2 = 5.7               |
| Ciprofloxacin<br>(CIP)    | $C_{17}H_{18}FN_3O_3$ |  | 0.28    | pKa1 = 6.1<br>pKa2 = 8.7               |

**Table S2 Pseudo-first-order kinetic and pseudo-second-order kinetic parameters of antibiotics adsorbed by (nano)microplastics in masks**

| Antibiotic | Parametric                  |                        |           |                               |                        |           |
|------------|-----------------------------|------------------------|-----------|-------------------------------|------------------------|-----------|
|            | Pseudo-first-order dynamics |                        |           | Pseudo-second-order dynamics  |                        |           |
|            | $K_1(\text{h}^{-1})$        | $Q_{e,1}(\text{ug/g})$ | $Adj.R^2$ | $K_1(\text{g}/(\text{ug/h}))$ | $Q_{e,2}(\text{ug/g})$ | $Adj.R^2$ |
|            | Origin outer                |                        |           |                               |                        |           |
| SMX        | 3.152                       | 1.494                  | 0.739     | 0.073                         | 6.942                  | 0.937     |
| CIP        | 6.555                       | 0.374                  | 0.867     | 0.009                         | 6.281                  | -18.810   |
| TC         | 4.263                       | 1.538                  | 0.827     | 0.728                         | 3.286                  | 0.913     |
|            | Aged outer                  |                        |           |                               |                        |           |
| SMX        | 3.111                       | 1.851                  | 0.840     | 0.849                         | 3.252                  | 0.918     |
| CIP        | 6.562                       | 0.205                  | 0.811     | 0.055                         | 7.013                  | 0.926     |
| TC         | 3.741                       | 2.042                  | 0.257     | 0.605                         | 4.134                  | 0.682     |
|            | Origin middle               |                        |           |                               |                        |           |
| SMX        | 2.973                       | 0.413                  | 0.220     | 0.277                         | 3.149                  | 0.820     |
| CIP        | 9.585                       | 0.268                  | 0.899     | 0.022                         | 11.858                 | 0.950     |
| TC         | 4.123                       | 1.525                  | 0.569     | 0.432                         | 4.392                  | 0.856     |
|            | Aged middle                 |                        |           |                               |                        |           |
| SMX        | 3.189                       | 0.234                  | 0.498     | 0.143                         | 3.418                  | 0.735     |
| CIP        | 9.445                       | 0.275                  | 0.955     | 0.029                         | 10.533                 | 0.979     |
| TC         | 4.455                       | 1.416                  | 0.929     | 0.558                         | 4.617                  | 0.806     |
|            | Origin inner                |                        |           |                               |                        |           |
| SMX        | 2.582                       | 1.757                  | 0.172     | 0.711                         | 2.760                  | 0.685     |

---

|     |       |       |            |       |       |       |
|-----|-------|-------|------------|-------|-------|-------|
| CIP | 5.899 | 0.685 | 0.912      | 0.105 | 6.889 | 0.947 |
| TC  | 3.677 | 1.564 | 0.700      | 1.738 | 3.772 | 0.813 |
|     |       |       | Aged inner |       |       |       |
| SMX | 2.598 | 0.744 | 0.009      | 0.737 | 2.754 | 0.686 |
| CIP | 7.677 | 0.147 | -0.511     | 0.117 | 0.799 | 0.953 |
| TC  | 4.213 | 1.660 | 0.621      | 0.557 | 4.446 | 0.813 |

---



**Table S3**

Intraparticle diffusion parameters of antibiotics adsorbed by microplastics in masks

| Antibiotic | Intraparticle diffusion model parameters             |                              |           |                                                      |                              |           |                                                      |                              |           |
|------------|------------------------------------------------------|------------------------------|-----------|------------------------------------------------------|------------------------------|-----------|------------------------------------------------------|------------------------------|-----------|
|            | First stage                                          |                              |           | Second stage                                         |                              |           | Third stage                                          |                              |           |
|            | $K_{id} (\mu\text{g}/(\text{g}\cdot\text{h}^{0.5}))$ | $C_i (\mu\text{g}/\text{g})$ | $Adj.R^2$ | $K_{id} (\mu\text{g}/(\text{g}\cdot\text{h}^{0.5}))$ | $C_i (\mu\text{g}/\text{g})$ | $Adj.R^2$ | $K_{id} (\mu\text{g}/(\text{g}\cdot\text{h}^{0.5}))$ | $C_i (\mu\text{g}/\text{g})$ | $Adj.R^2$ |
|            | Origin outer                                         |                              |           |                                                      |                              |           |                                                      |                              |           |
| SMX        | 2.2970                                               | 0.2797                       | 0.9613    | 0.5295                                               | 5.4073                       | 0.9936    | -0.6571                                              | 13.3270                      | 0.9452    |
| CIP        | 1.8429                                               | 0.5408                       | 0.9690    | -0.1194                                              | 4.3206                       | 0.7347    | 0.3810                                               | 1.8974                       | 0.7242    |
| TC         | 1.6937                                               | -0.8209                      | 0.9754    | 0.5759                                               | 0.8044                       | 0.9544    | 0.5202                                               | -0.0829                      | 0.7289    |
|            | Aged outer                                           |                              |           |                                                      |                              |           |                                                      |                              |           |
| SMX        | 6.6024                                               | -0.4785                      | 0.9393    | 0.7126                                               | 10.2598                      | 0.8933    | -                                                    | -                            | -         |
| CIP        | 3.1155                                               | 0.6420                       | 0.8966    | 0.4240                                               | 5.5756                       | 0.9198    | -0.1536                                              | 8.4434                       | 0.7249    |
| TC         | 3.5535                                               | 0.3571                       | 0.9189    | 0.5857                                               | 4.6493                       | 0.9409    | -0.2925                                              | 9.7059                       | 0.9965    |
|            | Origin middle                                        |                              |           |                                                      |                              |           |                                                      |                              |           |
| SMX        | 4.1134                                               | -1.6346                      | 0.8518    | 1.2451                                               | 0.7628                       | 0.9881    | -0.3101                                              | 8.5756                       | 0.3381    |
| CIP        | 2.0258                                               | 1.2696                       | 0.9057    | 1.4532                                               | 1.7765                       | 0.9203    | 0.3562                                               | 6.4334                       | 0.7478    |
| TC         | 0.9048                                               | 0.4688                       | 0.8508    | -0.0471                                              | 3.2129                       | 0.2947    | -                                                    | -                            | -         |
|            | Aged middle                                          |                              |           |                                                      |                              |           |                                                      |                              |           |
| SMX        | 3.9667                                               | 1.2735                       | 0.8489    | -0.1605                                              | 9.8510                       | 0.9987    | 0.5697                                               | 6.3141                       | 0.8571    |
| CIP        | 1.2489                                               | 1.2011                       | 0.7079    | 0.3841                                               | 2.6712                       | 0.8690    | -0.1497                                              | 5.3951                       | 0.6631    |
| TC         | 3.8863                                               | -1.1702                      | 0.9326    | -0.1844                                              | 6.4757                       | 0.6672    | 0.4387                                               | 3.5292                       | 0.7925    |
|            | Origin inner                                         |                              |           |                                                      |                              |           |                                                      |                              |           |
| SMX        | 2.5417                                               | 0.8721                       | 0.9149    | -0.3053                                              | 8.7798                       | 0.4278    | -0.8251                                              | 14.3439                      | 0.8214    |

---

|     |        |         |        |            |         |        |         |        |        |
|-----|--------|---------|--------|------------|---------|--------|---------|--------|--------|
| CIP | 1.9752 | 0.1579  | 0.5792 | 0.2216     | 2.8499  | 0.8496 | -       | -      | -      |
| TC  | 4.7802 | -1.9806 | 0.9861 | 1.3444     | 0.1925  | 0.8139 | -0.1083 | 4.5061 | 0.9780 |
|     |        |         |        | Aged inner |         |        |         |        |        |
| SMX | 3.6740 | 2.3337  | 0.9699 | 0.2602     | 11.6269 | 0.4264 | -       | -      | -      |
| CIP | 2.2664 | 1.7643  | 0.8768 | 0.4106     | 6.5092  | 0.2303 | 0.8345  | 3.8468 | 0.8917 |
| TC  | 2.6716 | 1.1051  | 0.9740 | -0.3244    | 9.6888  | 0.9979 | 0.3479  | 6.3339 | 0.8530 |

---

**Table S4**

Isothermal model parameters of microplastic adsorption data on origin and aging masks of antibiotics

| Antibiotic    | Freundlich model |        |           | Langmuir model |                |           |
|---------------|------------------|--------|-----------|----------------|----------------|-----------|
|               | $K_F(L/g)$       | $n_f$  | $Adj.R^2$ | $K_L(L/\mu g)$ | $Q_m(\mu g/g)$ | $Adj.R^2$ |
| Origin outer  |                  |        |           |                |                |           |
| TC            | 0.0259           | 1.5825 | 0.9454    | 1049.5941      | 3.0822E-5      | 0.9485    |
| SMX           | 0.2189           | 1.6612 | 0.8994    | 81.2873        | 1.8957E-4      | 0.8244    |
| CIP           | 0.0473           | 1.3324 | 0.9714    | 128.4477       | 5.7648E-5      | 0.9592    |
| Aged outer    |                  |        |           |                |                |           |
| TC            | 0.1279           | 1.7568 | 0.9667    | 30.7448        | 2.7102E-4      | 0.9084    |
| SMX           | 0.1140           | 1.2526 | 0.9736    | 391.4255       | 7.6058E-5      | 0.9884    |
| CIP           | 0.0079           | 1.0310 | 0.9890    | 16138.7045     | 3.7616E-7      | 0.9886    |
| Origin middle |                  |        |           |                |                |           |
| TC            | 1.8687E-4        | 0.8315 | 0.7876    | 209006.0912    | 5.6054E-9      | 0.7856    |
| SMX           | 9.1318E-5        | 0.6759 | 0.9858    | 2.0377E6       | 3.5590E-9      | 0.9583    |
| CIP           | 0.1132           | 1.5200 | 0.9525    | 77.3341        | 1.5181E-4      | 0.9249    |
| Aged middle   |                  |        |           |                |                |           |
| TC            | 0.0025           | 1.0029 | 0.9542    | 9635.3583      | 2.5652E-7      | 0.9542    |
| SMX           | 0.0880           | 1.2526 | 0.9732    | 298.4014       | 7.8425E-5      | 0.9879    |
| CIP           | 5.0016E-4        | 0.7776 | 0.9916    | 229565.1148    | 2.7440E-8      | 0.9659    |
| Origin inner  |                  |        |           |                |                |           |
| TC            | 0.0162           | 1.3489 | 0.9475    | 21.8272        | 1.5420E-4      | 0.951     |

---

|            |        |        |        |            |           |        |
|------------|--------|--------|--------|------------|-----------|--------|
| SMX        | 0.0251 | 1.1300 | 0.9832 | 468.7538   | 2.2474E-5 | 0.9799 |
| CIP        | 0.0865 | 1.3783 | 0.9342 | 147.3713   | 8.1695E-5 | 0.9171 |
| Aged inner |        |        |        |            |           |        |
| TC         | 0.0194 | 1.2559 | 0.9823 | 66.3926    | 7.3366E-5 | 0.9897 |
| SMX        | 0.0382 | 1.1053 | 0.9744 | 28969.8989 | 5.7467E-7 | 0.9688 |
| CIP        | 0.0705 | 1.2742 | 0.9744 | 212.6909   | 8.0515E-5 | 0.9866 |

---
