# Supplementary material for: Interaction of disposable face mask (nano)microplastics with antibiotics: performance and mechanisms
Source: Royal Society of Chemistry journal article supplement (doi:10.1039/d3en00775h), 2024-01-01
Supplement: d3en00775h2.pdf [file d3en00775h2.pdf]

## Supplementary data

Supplementary data related to this article can be found at

**Fig.S1.** Linear relationship between  $Q_e$  and octanol-water partition coefficient ( $\log K_{ow}$ ) of three antibiotics in pure water

**Fig. S2.** Change of species fraction of TC (a), SMX (b), CIP (c) with pH value of solution.

**Table S1** Physicochemical properties of tested antibiotics

**Table S2** Pseudo-first-order kinetic and pseudo-second-order kinetic parameters of antibiotics adsorbed by (nano)microplastics in masks

**Table S3** Intraparticle diffusion parameters of antibiotics adsorbed by (nano)microplastics in masks

**Table S4** Isothermal model parameters of (nano)microplastic adsorption data on origin and aging masks of antibiotics
